# Supplementary material for: Template-directed synthesis of a luminescent Tb-MOF material for highly selective Fe3+ and Al3+ ion detection and VOC vapor sensing
Source: Royal Society of Chemistry journal article supplement (doi:10.1039/c6tc05349a), 2017-01-01
Supplement: c6tc05349a1.pdf [file c6tc05349a1.pdf]

*Electronic Supplementary Information*

**Template-directed synthesis of a luminescent Tb-MOF material for highly selective  
Fe<sup>3+</sup> and Al<sup>3+</sup> ions detection and VOC vapor sensing**

Di-Ming Chen, Nan-Nan Zhang, Chun-Sen Liu\* and Miao Du\*

*Henan Provincial Key Laboratory of Surface & Interface Science, Zhengzhou University of Light  
Industry, Zhengzhou 450002, Henan, China*

Authors for correspondence: chunsenliu@zzuli.edu.cn; dumiao@zzuli.edu.cn

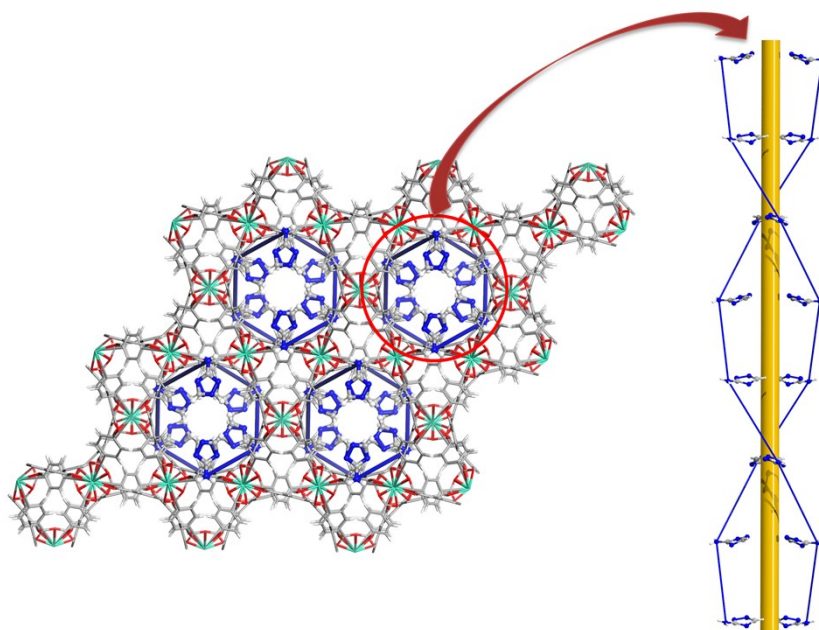

**Fig. S1** View of the double-stranded helical chains formed by the Hatz ligands.

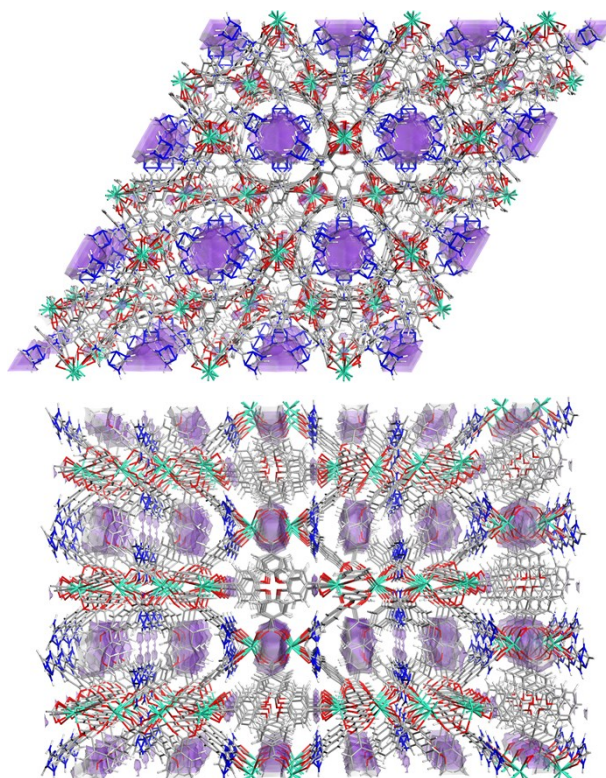

**Fig. S2** View of the finite spaces partitioned by the Hatz ligands.

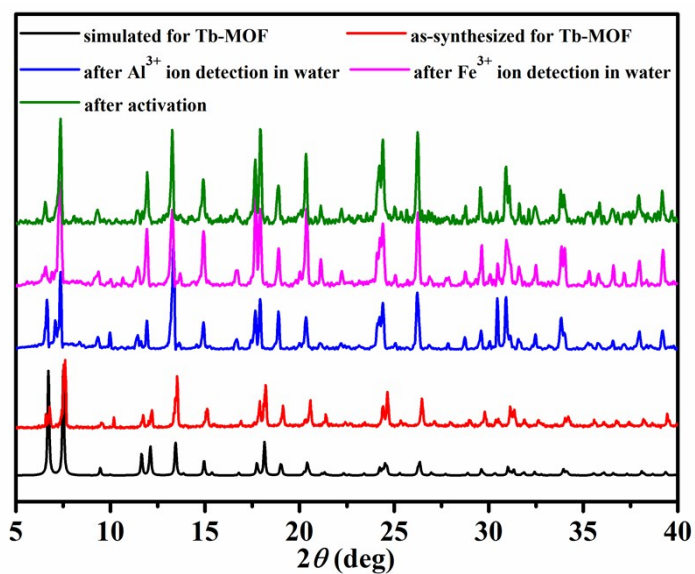

**Fig. S3** PXR D patterns for the Tb-MOF and its derivatives.

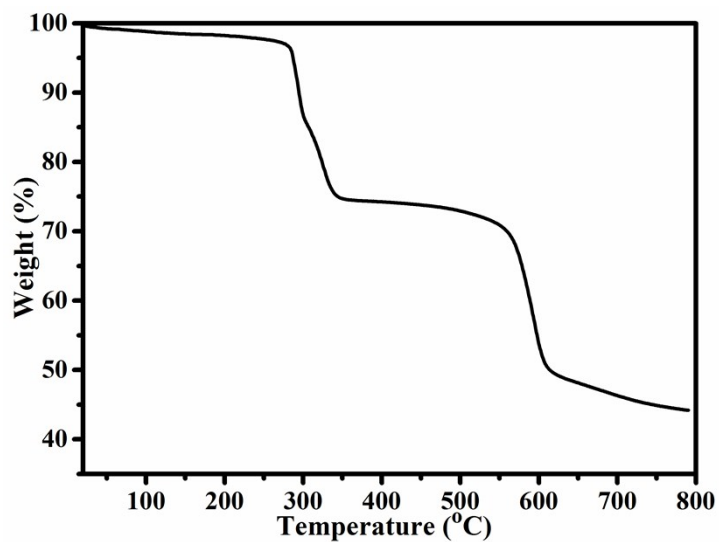

**Fig. S4** TGA curve for the Tb-MOF.

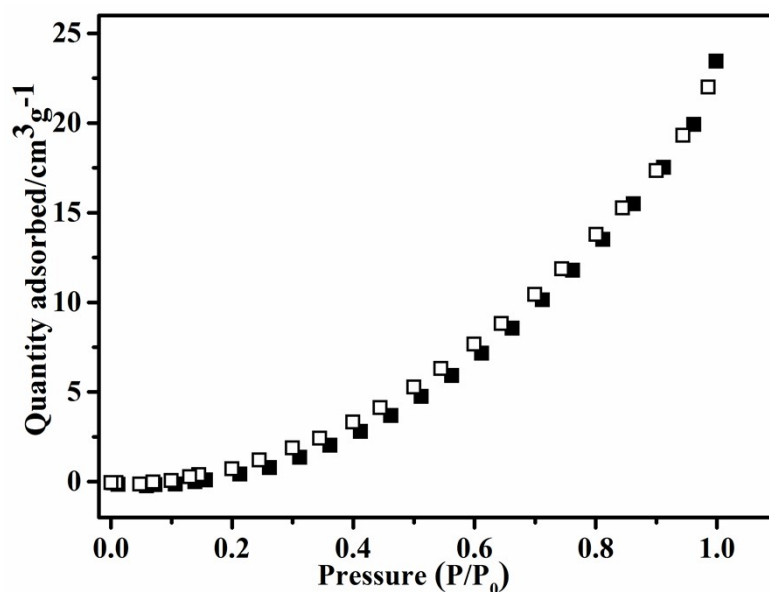

**Fig. S5** N<sub>2</sub> sorption isotherm for the activated Tb-MOF at 77 K.

### Calculation of sorption heat for CO<sub>2</sub> and C<sub>2</sub>H<sub>2</sub> uptake using Virial fitting

$$\ln P = \ln N + 1/T \sum_{i=0}^m a_i N^i + \sum_{i=0}^n b_i N^i \quad Q_{\text{st}} = -R \sum_{i=0}^m a_i N^i$$

The above virial expression was used to fit the combined isotherm data for **1a** at 273 and 298 K, where  $P$  is the pressure,  $N$  is the adsorbed amount,  $T$  is the temperature,  $a_i$  and  $b_i$  are virial coefficients, and  $m$  and  $n$  are the number of coefficients used to describe the isotherms.  $Q_{\text{st}}$  is the coverage-dependent enthalpy of sorption and  $R$  is the universal gas constant.

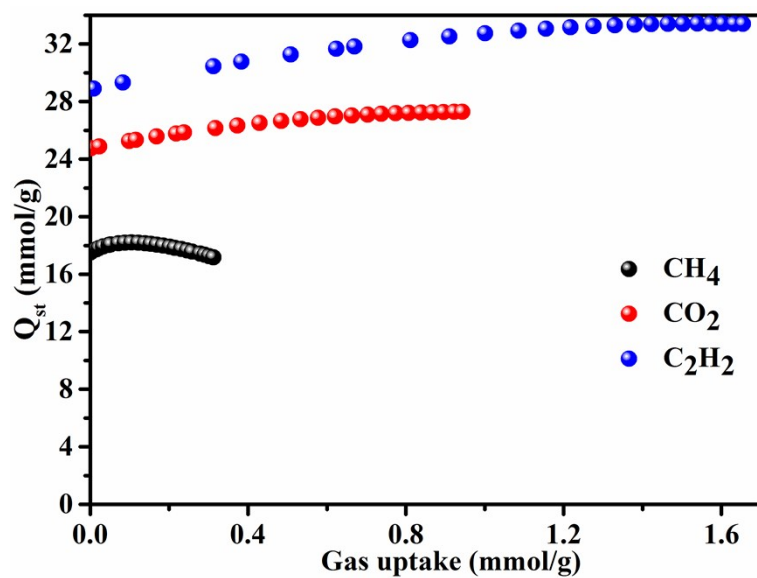

**Fig. S6** Gas adsorption heats for the activated Tb-MOF.

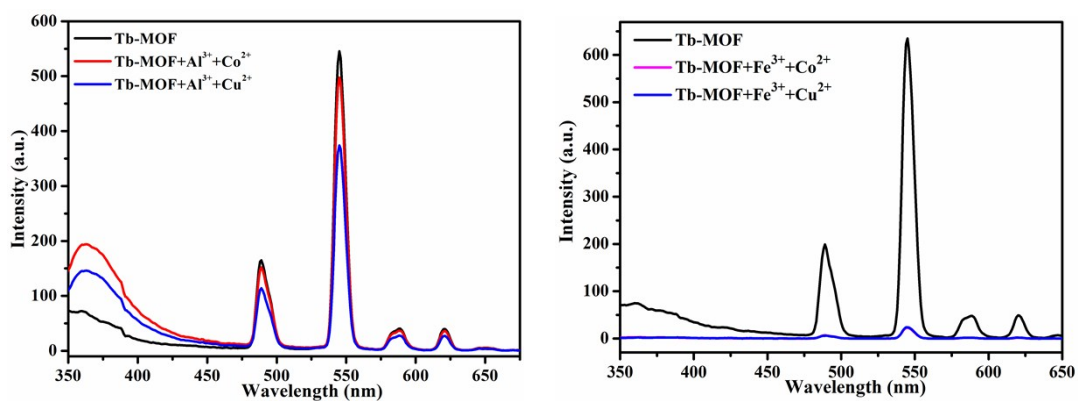

**Fig. S7** The competition experiments for the detection of  $\text{Fe}^{3+}$  and  $\text{Al}^{3+}$  ions in the presence of  $\text{Cu}^{2+}$  or  $\text{Co}^{2+}$  ion.

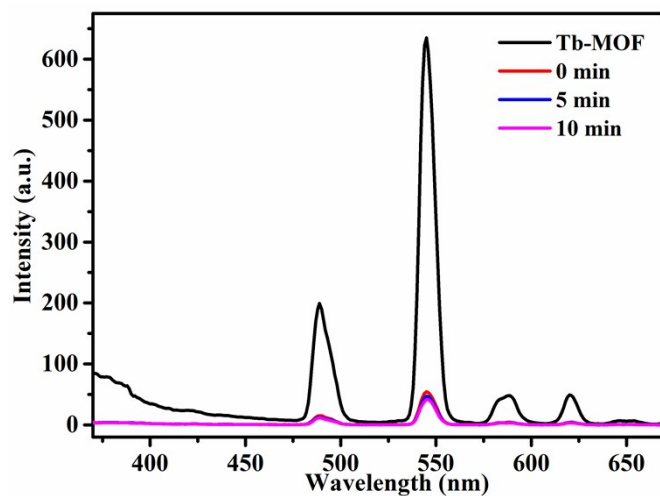

**Fig. S8** Time-dependent emission spectra for the Tb-MOF in water containing  $10^{-3}$  M  $\text{Fe}^{3+}$  ion.

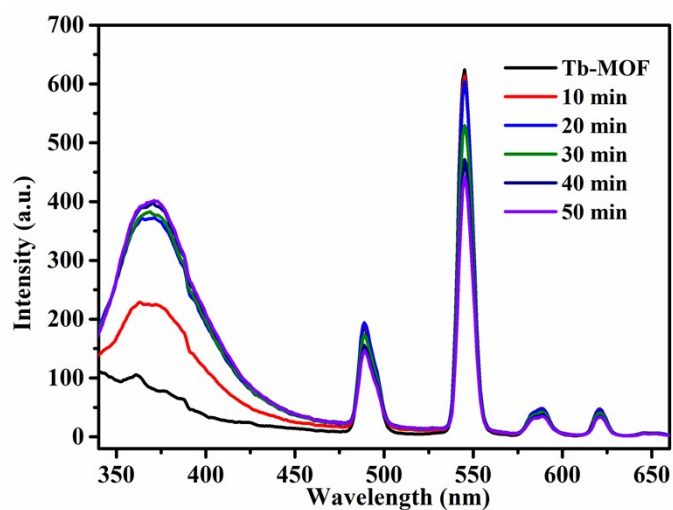

**Fig. S9** Time-dependent emission spectra for the Tb-MOF in water containing  $10^{-3}$  M  $\text{Al}^{3+}$  ion.

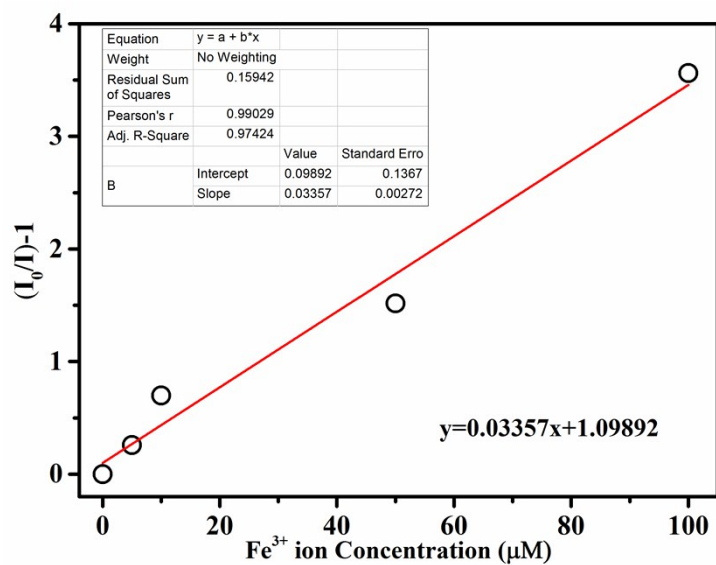

**Fig. S10**  $K_{sv}$  curve of Tb-MOF in aqueous solutions in the presence of various concentrations of  $Fe^{3+}$  ion.

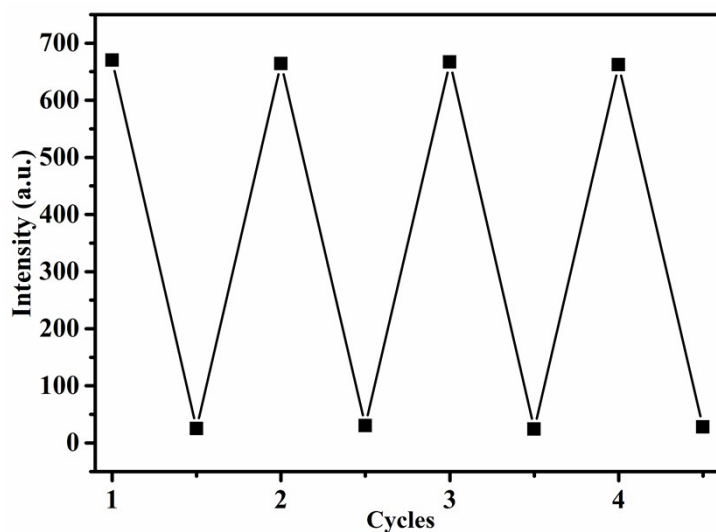

**Fig. S11** The quenching and recovery tests of **1**.

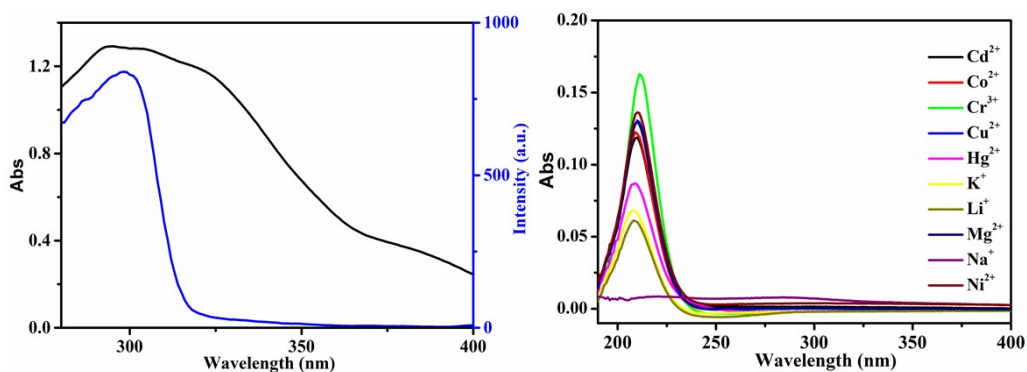

**Fig. S12** Views for the UV adsorption spectrum of  $\text{Fe}^{3+}$  ion in water and extraction spectrum for the Tb-MOF (left) and the UV adsorption spectra of other metal ions used in the luminescent detection (right).

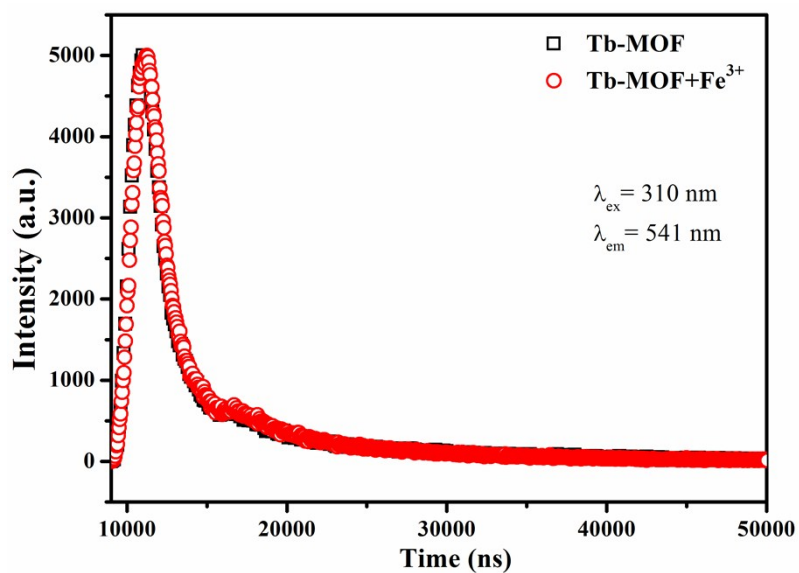

**Fig. S13** Fluorescence decay profiles of Tb-MOF in the presence or absence of  $\text{Fe}^{3+}$  ion.



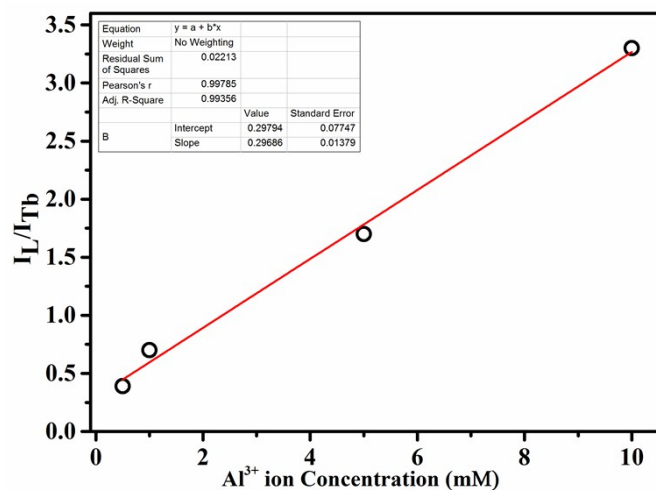

**Fig. S14** Linear relationship of ratio for the ligand-based and metal-based emission intensity vs. the concentration of  $\text{Al}^{3+}$  ion.

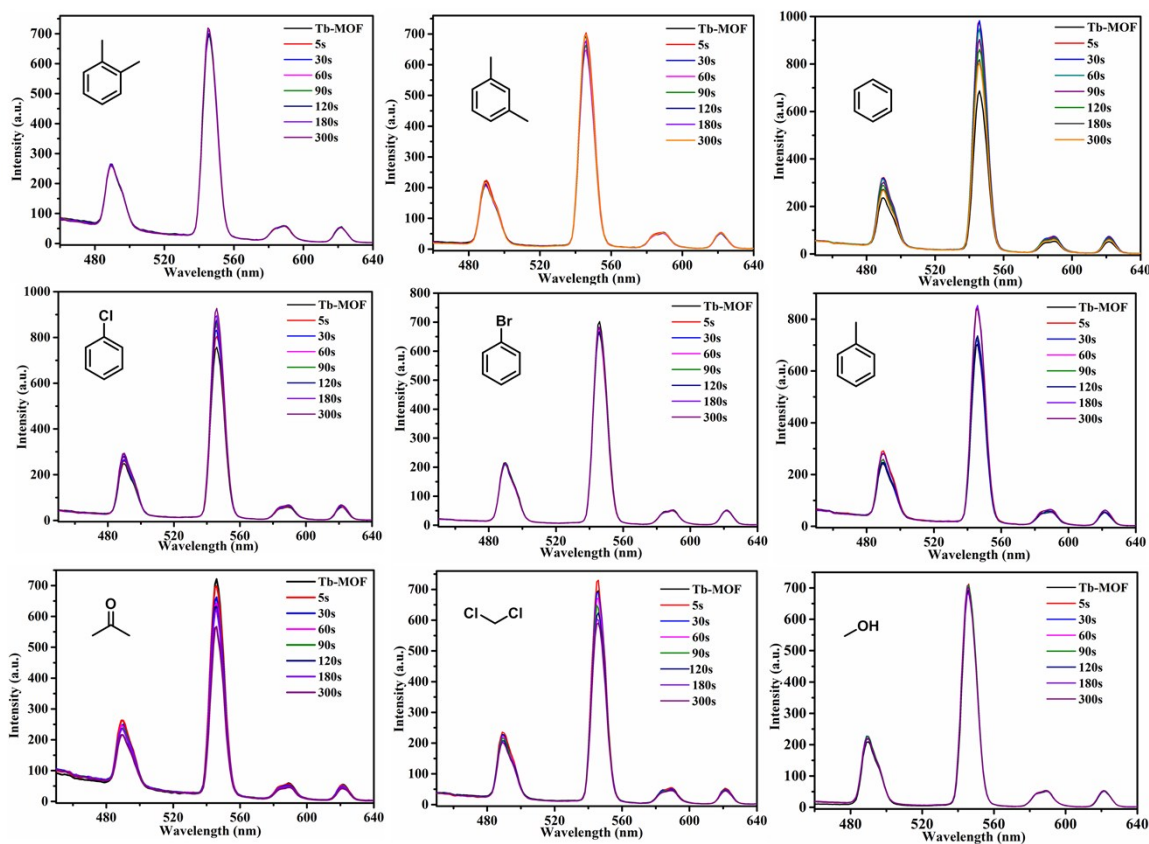

**Fig. S15** Time-dependent emission spectra for the Tb-MOF in various VOC vapors.

**Table S1** Crystal data and structure refinement details for Tb-MOF.

|                                                 |                                                                   |
|-------------------------------------------------|-------------------------------------------------------------------|
| Empirical formula                               | C <sub>32</sub> H <sub>28</sub> N <sub>5</sub> O <sub>10</sub> Tb |
| Formula weight                                  | 801.51                                                            |
| Temperature / K                                 | 293(2)                                                            |
| Crystal system                                  | hexagonal                                                         |
| Space group                                     | <i>P</i> 6 <sub>4</sub> 22                                        |
| <i>a</i> / Å                                    | 15.1834(4)                                                        |
| <i>b</i> / Å                                    | 15.1834(4)                                                        |
| <i>c</i> / Å                                    | 26.5282(9)                                                        |
| $\alpha$ / °                                    | 90                                                                |
| $\beta$ / °                                     | 90                                                                |
| $\gamma$ / °                                    | 120                                                               |
| Volume / Å <sup>3</sup>                         | 5296.3(3)                                                         |
| <i>Z</i>                                        | 6                                                                 |
| $\rho_{\text{calc}}$ / g cm <sup>-3</sup>       | 1.508                                                             |
| $\mu$ / mm <sup>-1</sup>                        | 2.063                                                             |
| <i>F</i> (000)                                  | 2400.0                                                            |
| Radiation                                       | Mo K $\alpha$ ( $\lambda$ = 0.7107)                               |
| Reflections collected                           | 14753                                                             |
| Independent reflections                         | 3121 [ $R_{\text{int}}$ = 0.0275, $R_{\text{sigma}}$ = 0.0205]    |
| Data/restraints/parameters                      | 3121/46/242                                                       |
| Goodness-of-fit on <i>F</i> <sup>2</sup>        | 1.124                                                             |
| Final <i>R</i> indexes [ $I \geq 2\sigma(I)$ ]  | $R_1 = 0.0381$ , $wR_2 = 0.1045$                                  |
| Final <i>R</i> indexes [all data]               | $R_1 = 0.0456$ , $wR_2 = 0.1120$                                  |
| Largest diff. peak and hole / e Å <sup>-3</sup> | 1.03 and -0.62                                                    |
| Flack parameter                                 | -0.003(8)                                                         |
